# Supplementary material for: IL-1 receptor blockade skews inflammation towards Th2 in a mouse model of systemic sclerosis
Source: PubMed Central journal article supplement — Eur Respir J. 2019 Sep 29;54(3):1900154. doi: 10.1183/13993003.00154-2019 (PMC6860995; doi:10.1183/13993003.00154-2019), 2019-09-29
Supplement: ERJ-00154-2019.SUPPLEMENT.pdf [file ERJ-00154-2019.SUPPLEMENT.pdf]

## **SUPPLEMENTARY MATERIAL AND METHODS**

### *Study population*

Human tissue samples of SSc lungs were obtained from archival and anonymised lung tissue samples removed as part of the patient's medical care or post-mortem examination (Department of Pathology of the University of Pittsburgh) or from SSc patients undergoing lung transplantation (Department of Surgery, Division of Thoracic Surgery, Medical University of Vienna, Austria). Downsized non-transplanted donor lungs (Division of Thoracic Surgery, Medical University of Vienna) served as healthy controls. The protocol and tissue usage was approved by the local authorities (Vienna: institutional ethics committee [976/2010]; Pittsburgh: institutional review board [PRO1110204]) and patient consent was obtained before lung transplantation. Scleroderma patients met American College of Rheumatology diagnostic criteria for systemic sclerosis or LeRoy and Medsger criteria for early systemic sclerosis [1, 2]. The patients' characteristics are listed in table S1.

### *Animal experiments*

Female Fra-2 transgenic (TG) mice and wild-type (WT) littermates were maintained under specific pathogen free conditions in isolated ventilated cages with 12 hour light/dark cycles. All animal experiments met EU guidelines 2010/63/EU and were approved by the local authorities (Austrian Ministry of Education, Science and Culture). The characterisation of hemodynamic and lung function was performed in Fra-2 TG and WT mice at 20 weeks of age. 25 mg/kg anakinra (Kineret, Swedish Orphan Biovitrum, Stockholm, Sweden) was given via daily intraperitoneal injection for a total of eight weeks as previously described [3]. Control groups received injections with an equal volume of sterile saline solution. Mice were sacrificed at 18-19 weeks of age. Anakinra treatment was performed in 2 independent experiments with five to seven mice per group.

### *Bronchoalveolar lavage fluid (BALF)*

After sacrifice animals were lavaged with 1 ml PBS containing protease inhibitor cocktail (Roche) and 1mM EDTA and total cell counts were made.

### *Single cell lung tissue homogenates*

Single cell lung tissue homogenates were performed as previously described [4]. In short, the lower right lobe was digested with 0.7 mg/ml Collagenase and 30 µg/ml DNase for 40 minutes at 37°C. The tissue was passed through 100 µm cell strainer to obtain a single cell suspension.

### *Flow cytometry*

BAL and single cell lung tissue homogenates were analysed using a LSRII flow cytometer and analysed with the FACSDiva software (BD Biosciences) as previously described [4]. Cells were initially gated on CD45 positivity and were identified as follows: neutrophils (CD11b+, CD11c-, Gr-1+), macrophages (CD11b low, CD11c+, Siglec-F+), dendritic cells (CD11b+, CD11c+, MHC-II high), T helper cells (CD3+, CD4+), cytotoxic T cells (CD3+, CD8+), B cells (CD19+), and eosinophils (CD11b+, CD11c-, Siglec F+). Antibody details are provided in table S2.

### *Immunohistochemistry and tissue staining*

Human and murine lung samples were formalin-fixed, paraffin embedded and cut into 2.5 µm sections. Sections were deparaffinised in xylene followed by rehydration in decreasing concentrations of ethanol. Tissue was stained with Masson's trichrome or Sirius red for histological collagen analysis. For immunohistochemical analyses the antigen retrieval was done in sodium citrate pH6 or EDTA-Tris pH9. Stainings were performed using ZytoChem Plus AP-Fast Red Kit (Zymed Laboratories, USA) or ImmPress™ Kit with NovaRed Substrate, (Vector Laboratories, USA) or Vector Vip Peroxidase (HRP) Substrate Kit (Vector Laboratories, Burlingame, CA) according to the manufacturer's instructions. Negative controls were performed by omission of the first antibody. Antibodies used are listed in table S3. Images were digitalised using a VS120 slide scanning microscope (Olympus, Germany).

### *Quantification of vascular remodelling and histological scoring*

Tissue sections were analysed using Visiopharm integrated software VIS (Visiopharm, Denmark). The degree of muscularisation was quantified on mouse lung tissue sections stained by double immunohistochemistry with endothelial marker von Willebrand factor (vWF) and α-smooth muscle actin (α-Sma) as described previously [5]. Per mouse, 145±80

(minimum: 36, maximum 373) vessels, ranging from 10 to 100  $\mu\text{m}$  in size, were analysed. Deposition of collagen was analysed on one Sirius red stained lung section per mouse. To obtain values reflecting collagen deposition in the parenchyma only, bronchi and vessels with a diameter larger than 200  $\mu\text{m}$ , including 50  $\mu\text{m}$  surrounding, were excluded from the analysis.

Histological scoring was performed on hematoxylin-eosin and trichrome stained lung sections by a pathologist in a blinded manner. Vascular and parenchymal remodelling was determined giving scores from 0 (no remodelling) to 3 (severe remodelling). Further, inflammation in the perivascular, peribronchial and interstitial lung compartments was assessed with scores representing no (0), mild (1), moderate (2) and severe (3) inflammation.

#### *Cell isolation and cell culture*

Human primary pulmonary arterial smooth muscle cells (PASMCs) and parenchymal fibroblasts (PFs) were obtained from downsizing donor lungs. Experiments were performed with cells between passages 2-6. Cells were grown in full medium (DMEM-F12, 10% FCS, 1% glutamine and antibiotic/antimycotics, Gibco for PFs; VascuLife SMC Complete Kit; LifeLine Technology for PASMCs). Cells were starved for a minimum of 12 hours in basal medium without FCS prior to stimulation with 1 ng/mL of recombinant IL-1 $\alpha$  (Peprotech, USA) or 10 ng/mL of recombinant IL-1 $\beta$  (Peprotech, USA). In inhibitor experiments, cells were pretreated with 50  $\mu\text{M}$  U0126 (Sigma-Aldrich, Austria), or PS1145 (Tocris Bioscience, UK) for 1 hour before addition of IL-1 stimulus. Fra-2 was overexpressed by transfecting PFs with a CMV-hu-Fra-2 (pCDNA3.1) vector construct using Lipofectamine 3000 Reagent (Thermo Scientific, Austria) for 24 hours. The construct (CMV-hu-Fra-2 [pcDNA3]) was a kind gift from Latifa Bakiri, PhD (Spanish National Cancer Research Center Genes, Spain).

#### *Proliferation*

Proliferation of PASMCs and PFs was determined by [ $^3\text{H}$ ] thymidine incorporation assay (BIOTREND Chemikalien, Germany). 5000 cells per well were seeded in a 96 well plate. The cells were starved in basal medium without FCS overnight prior to stimulation with IL-1 $\alpha$  (1 ng/ml) or IL-1 $\beta$  (10 ng/ml). PDGF-BB (10 ng/mL, Sigma Aldrich) stimulated cells served as

positive control. [<sup>3</sup>H] thymidine incorporation was measured after 24 or 48 hours. Results are expressed as the relative proliferation compared to untreated cells in basal media.

#### *Western blotting*

Proteins were isolated from mouse lung homogenate samples using RIPA buffer (Sigma). To obtain nuclear or cytoplasmic fractions, the NE-PER Nuclear and Cytoplasmic Extraction Kit (Thermo Scientific, Austria) was used. Protein samples were separated by SDS-PAGE and transferred to PVDF membranes (GE Healthcare, UK). Membranes were incubated with the primary antibody overnight at 4°C and one hour at room temperature with the HRP-conjugated secondary antibody. Primary and secondary antibodies used in this study are listed in table S3. Membranes were incubated with ECL prime developing solution (GE Healthcare, UK) and signal detection was done using a ChemiDoc Touch Imaging System (Bio-Rad, USA).

#### *RNA isolation and real-time RT-PCR*

Total RNA, isolated from lung homogenates or cells using the peqGOLD Total RNA Kit (Peqlab, Germany), was reverse transcribed using the iScript cDNA Synthesis kit (Bio-Rad, USA). The real-time RT-PCR reaction was run on a LightCycler 480 System (Roche Applied Science, Austria) using a QuantiFast SYBR Green PCR kit (Qiagen, Germany). Melting curve analysis and gel electrophoresis was performed to confirm the specific amplification of the expected PCR products. Hydroxymethylbilane synthase (HMBS) and beta-2-microglobulin (B2M) served as reference genes. The difference in threshold cycle (Ct) values was calculated as follows:  $\Delta Ct = \text{meanCt reference genes} - \text{Ct target gene}$ .  $\Delta\Delta Ct = \Delta Ct - \Delta Ct^{(\text{untreated control})}$ . Primer sequences are provided in table S4.

#### *Electrophoretic Mobility Shift Assay (EMSA)*

EMSA was performed using nuclear extracts (NE-PER Nuclear and Cytoplasmic Extraction Kit, Thermo Scientific) from Fra-2-overexpressing human PFs and from lung homogenates of Fra-2 TG mice and WT littermate controls. 3'biotin-labelled probes, corresponding to predicted AP-1 binding sites in the promoter regions of human or mouse IL-1 $\alpha$  gene, were used and are depicted in table S5. DNA binding was assessed using the LightShift Chemiluminescent EMSA

Kit (Thermo Scientific, Austria), following manufacturer's protocol. Equal loading of nuclear extract was confirmed by Western blotting.

#### *Enzyme-linked immunosorbent assay (ELISA)*

Protein concentrations of IL-1 $\alpha$  and IL-1 $\beta$  in plasma and bronchoalveolar lavage (BAL) fluid of Fra-2 TG mice and WT littermate controls were measured by ELISA according to the manufacturer's instruction (IL-1alpha/IL-1beta Mouse Uncoated ELISA Kit, Invitrogen/ThermoFisher Scientific, Austria).

#### *Statistics*

Statistical analysis was performed in GraphPad Prism 5 software (Graph Pad Software Inc., USA). Data are expressed as single data points with median, if not stated otherwise. Comparisons between two groups with equal variances were done with unpaired student's t-test. Two groups with significantly different variances were compared using the Mann Whitney test. Treatment effects of anakinra on WT and TG mice were analysed by 2-way ANOVA with Bonferroni's post-test. Multi-group comparisons of cell culture protein and expression data were done using a Kruskal-Wallis test with Dunn's post-test for multiple comparisons. All statistical tests used for a specific data set are indicated in the Figure Legends. p-values below 0.05 were considered as statistically significant.

## **SUPPLEMENTARY RESULTS**

In the next step, we analysed which major inflammatory signalling pathways, such as mitogen-activated protein (MAP) kinases and inflammation-associated transcription factors, were affected by IL-1 $\alpha$  and IL-1 $\beta$  in PASMCs and PFs. IL-1 $\alpha$  and IL-1 $\beta$  induced a time-dependent phosphorylation of JNK, p38, Fra-2 and cJun in both PASMC and PF (Figure S3A). Fra-2 phosphorylation was evident by the appearance of higher molecular weight bands in the nuclear fraction. No activation of c-fos and AKT was observed (data not shown). Interestingly, PASMCs and PFs showed differential pathway regulation upon IL-1 stimulation: IL-1 $\alpha$  and IL-1 $\beta$  induced phosphorylation of ERK in PASMC but not in PF, whereas treatment with IL-1 $\alpha$  and IL-1 $\beta$  induced translocation of the p65 NF- $\kappa$ B subunit into the nucleus in PF but not in PASMC (Figure S2A). Using pharmacological inhibitors of JNK, ERK, p38 and NF- $\kappa$ B, it became evident that IL-1 $\alpha$ - and IL-1 $\beta$ -induced COL1 downregulation in PASMCs and PFs was mediated by ERK and NF- $\kappa$ B, respectively (Figure S3B).

## REFERENCES

1. Preliminary criteria for the classification of systemic sclerosis (scleroderma). Subcommittee for scleroderma criteria of the American Rheumatism Association Diagnostic and Therapeutic Criteria Committee. *Arthritis and rheumatism* 1980: 23(5): 581-590.
2. LeRoy EC, Medsger TA, Jr. Criteria for the classification of early systemic sclerosis. *The Journal of rheumatology* 2001: 28(7): 1573-1576.
3. Petrusek J, Bala S, Csak T, Lippai D, Kodys K, Menashy V, Barrieau M, Min SY, Kurt-Jones EA, Szabo G. IL-1 receptor antagonist ameliorates inflammasome-dependent alcoholic steatohepatitis in mice. *The Journal of clinical investigation* 2012: 122(10): 3476-3489.
4. Nagaraj C, Haitchi HM, Heinemann A, Howarth PH, Olschewski A, Marsh LM. Increased Expression of p22phox Mediates Airway Hyperresponsiveness in an Experimental Model of Asthma. *Antioxidants & redox signaling* 2017: 27(18): 1460-1472.
5. Park SH, Chen WC, Hoffman C, Marsh LM, West J, Grunig G. Modification of hemodynamic and immune responses to exposure with a weak antigen by the expression of a hypomorphic BMPR2 gene. *PloS one* 2013: 8(1): e55180.

**Table S1: patients characteristics**

| <b>Patient case</b> | <b>Gender</b> | <b>Age (years)</b> | <b>histologic description</b>                                                                                | <b>mPAP (mmHg)</b> | <b>PAWP (mmHg)</b> | <b>FVC (% predicted)</b> | <b>FEV1 (% predicted)</b> | <b>DLCO (% predicted)</b> |
|---------------------|---------------|--------------------|--------------------------------------------------------------------------------------------------------------|--------------------|--------------------|--------------------------|---------------------------|---------------------------|
| <b>5</b>            | Male          | 59                 | UIP with non-necrotizing granulomas and arteriopathy                                                         | NA                 | NA                 | 61                       | 66                        | 53                        |
| <b>12</b>           | Female        | 56                 | UIP with NSIP areas                                                                                          | NA                 | NA                 | 62                       | 74                        | NA                        |
| <b>13</b>           | Male          | 63                 | UIP with prominent NSIP areas associated with granulomas                                                     | 22                 | 14                 | 57                       | 64                        | 54                        |
| <b>28</b>           | Male          | 50                 | fibrointimal arterial thickening, desquamative interstitial pneumonia, generally preserved lung architecture | 57                 | 13                 | 87                       | 79,5                      | 51                        |



**Table S2: Antibody details for flow cytometry**

| <b>Antigen</b>  | <b>Label</b> | <b>Company</b> | <b>Clone</b> | <b>Isotype</b> | <b>Dilution Factor</b> |
|-----------------|--------------|----------------|--------------|----------------|------------------------|
| <b>CD3</b>      | FITC         | eBioscience    | 145-2C11     | Hamster IgG    | 1:20                   |
| <b>CD4</b>      | APC          | Biolegend      | GK1.5        | Rat IgG2b, κ   | 1:100                  |
| <b>CD8</b>      | PE           | Biolegend      | 53-6.7       | Rat IgG2a, κ   | 1:200                  |
| <b>CD11b</b>    | V500         | BD Bioscience  | M1/70        | Rat IgG2b, κ   | 1:50                   |
| <b>CD11c</b>    | ef450        | eBioscience    | N418         | Hamster IgG    | 1:50                   |
| <b>CD19</b>     | AF700        | Biolegend      | 6D5          | Rat IgG2a, κ   | 1:100                  |
| <b>CD24</b>     | PerCP Cy5.5  | BD Bioscience  | M1/69        | Rat IgG2b, κ   | 1:500                  |
| <b>CD25</b>     | APC-Cy7      | Biolegend      | PC61         | Rat IgG1, λ    | 1:50                   |
| <b>CD45</b>     | PerCP-Cy5.5  | eBioscience    | 30-F11       | Rat IgG2b, κ   | 1:200                  |
| <b>CD45</b>     | FITC         | Biolegend      | 30-F11       | Rat IgG2b, κ   | 1:200                  |
| <b>CD64</b>     | AF647        | BD Bioscience  | X54-5/7.1    | Mouse IgG1, κ  | 1:20                   |
| <b>gdTCR</b>    | BV421        | Biolegend      | GL3          | Hamster IgG    | 1:50                   |
| <b>Gr-1</b>     | PE-Cy7       | Biolegend      | RB6-8C5      | Rat IgG2b, κ   | 1:800                  |
| <b>MHC-II</b>   | APC-Cy7      | Biolegend      | M5/114.15.2  | Rat IgG2b, κ   | 1:400                  |
| <b>Siglec F</b> | PE           | BD Bioscience  | E50-2440     | Rat IgG2a, κ   | 1:20                   |

**Table S3: Antibodies details for immunohistochemistry and western blotting**

| <b>Antibody</b>      | <b>Catalogue #</b> | <b>Company</b>   | <b>purpose</b>        | <b>Dilution</b> |
|----------------------|--------------------|------------------|-----------------------|-----------------|
| <b>vWF</b>           | A0082              | DAKO             | IHC - double staining | 1:900           |
| <b>α-SMA</b>         | EB06450            | Everest Biotech  | IHC                   | 1:100           |
|                      |                    |                  | Western Blotting      | 1:1000          |
| <b>Fra-2 (H103)</b>  | sc-13017           | Santa Cruz       | IHC                   | 1:200           |
|                      |                    |                  | Western Blotting      | 1:1000          |
| <b>IL-1α (H-159)</b> | sc7929             | Santa Cruz       | IHC                   | 1:100           |
| <b>IL-1β (H-153)</b> | sc7884             | Santa Cruz       | IHC                   | 1:50            |
| <b>Collagen I</b>    | 1310-01            | Southern Biotech | IHC                   | 1:800           |
|                      |                    |                  | Western Blotting      | 1:1000          |
| <b>Relmα</b>         | ab39626            | Abcam            | IHC                   | 1:200           |
| <b>α-tubulin</b>     | #2125S             | Cell signaling   | Western Blotting      | 1:5000          |
| <b>p-JNK</b>         | #4671S             | Cell signaling   | Western Blotting      | 1:1000          |
| <b>p-p38</b>         | #9211S             | Cell signaling   | Western Blotting      | 1:1000          |
| <b>p38</b>           | #9212S             | Cell signaling   | Western Blotting      | 1:1000          |
| <b>p-ERK1/2</b>      | #9101S             | Cell signaling   | Western Blotting      | 1:1000          |
| <b>ERK1/2</b>        | #9102S             | Cell signaling   | Western Blotting      | 1:1000          |
| <b>p-cJun</b>        | #3270S             | Cell signaling   | Western Blotting      | 1:1000          |
| <b>cJun</b>          | #9165S             | Cell signaling   | Western Blotting      | 1:1000          |
| <b>p65</b>           | #3987S             | Cell signaling   | Western Blotting      | 1:1000          |
| <b>Lamin</b>         | #2032S             | Cell signaling   | Western Blotting      | 1:1000          |

**Table S4: Primers used in this study**

| <b>Name</b>           | <b>Species</b> | <b>Forward (5'-3')</b>    | <b>Reverse (5'-3')</b>   |
|-----------------------|----------------|---------------------------|--------------------------|
| <b><i>Il1a</i></b>    | Mouse          | CGAAGACTACAGTTCTGCCATT    | GACGTTTCAGAGGTTCTCAGAG   |
| <b><i>Il1b</i></b>    | Mouse          | GCCACCTTTTGACAGTGATGAG    | GACAGCCCAGGTCAAAGGTT     |
| <b><i>Col1a1</i></b>  | Mouse          | AATGGCACGGCTGTGTGCGA      | AACGGGTCCCCTTGGGCCTT     |
| <b><i>Col1a2</i></b>  | Mouse          | TGTTGGCCCATCTGGTAAAGA     | CAGGGAATCCGATGTTGCC      |
| <b><i>Col3a1</i></b>  | Mouse          | GCCCTCCCGGGAATAACGGC      | TGGCTCTCCCTTCGCACCGT     |
| <b><i>Acta2</i></b>   | Mouse          | CAGCCAGTCGCTGTCAGGAACC    | CCAGCGAAGCCGGCCTTACA     |
| <b><i>Il4</i></b>     | Mouse          | ATGGATGTGCCAAACGTCCT      | TGCAGCTCCATGAGAACACT     |
| <b><i>Il13</i></b>    | Mouse          | GCCAAGATCTGTGTCTCTCCC     | CCAGGTCCACACTCCATACC     |
| <b><i>I17</i></b>     | Mouse          | AGGACGCGCAAACATGAGTC      | GGACACGCTGAGCTTTGAGG     |
| <b><i>Il12p35</i></b> | Mouse          | GACCCTGTGCCTTGGTAGCATC    | TGCTTCTCCACAGGAGGTTTC    |
| <b><i>Ifng</i></b>    | Mouse          | CAGCAACAGCAAGGCGAAAAAGG   | TTTCCGCTTCCTGAGGCTGGAT   |
| <b><i>Retnla</i></b>  | Mouse          | TGGCTTTGCCTGTGGATCTT      | GCAGTGGTCCAGTCAACGAGTA   |
| <b><i>Chil3</i></b>   | Mouse          | CCAGAAGCAATCCTGAAGACAC    | GCACATCAGCTGGTAGGAAG     |
| <b><i>Igf1</i></b>    | Mouse          | TCAGAAGTCCCCGTCCCTAT      | TGGGAGGCTCCTCCTACATT     |
| <b><i>Hmbs</i></b>    | Mouse          | GCCAGAGAAAAGTGCCGTGGG     | TCCGGAGGCGGGTGTGAGG      |
| <b><i>β2m</i></b>     | Mouse          | CGGCCTGTATGCTATCCAGAAAACC | TGTGAGGCGGGTGGAACTGTG    |
| <b><i>COL1A1</i></b>  | Human          | ACATGTTTCAGCTTTGTGGACC    | TGTACGCAGGTGATTGGTGG     |
| <b><i>ACTA2</i></b>   | Human          | GCCTTGGTGTGTGACAATGG      | ACCATCACCCCCTGATGTCT     |
| <b><i>HMBS</i></b>    | Human          | TCGGAGCCATCTGCAAGCGG      | GCCGGGTGTTGAGGTTTCCCC    |
| <b><i>β2M</i></b>     | Human          | CCTGGAGGCTATCCAGCGTACTCC  | TGTCGGATGGATGAAACCCAGACA |

**Table S5: EMSA probes used in this study**

| <b>Gene</b>             | <b>sequence</b>             | <b>label</b>    |
|-------------------------|-----------------------------|-----------------|
| <b>hulL1A_sense</b>     | GTTCTCTGTTGCAGAAGTCAAGATG   | 3'-biotinylated |
| <b>hulL1A_antisense</b> | CATCTTGACTTCTGCAACAGAGAAC   |                 |
| <b>mull1a_sense</b>     | CAGAGAAGCCTGACTCAGACTTAAGTC | 3'-biotinylated |
| <b>mull1a_antisense</b> | GACTTAAGTCTGAGTCAGGCTTCTCTG |                 |

**Table S6: Histological scoring of Fra-2 TG mice with (TG+A) or without (TG) anakinra treatment.**

0: no remodelling/inflammation; 1: mild remodelling/inflammation; 2: moderate remodelling/inflammation; 3: severe remodelling/inflammation; A: arteries;V: veins; Alv: alveolar;Ly: lymphocytes; H: histiocytes; Eo: eosinophils; N: neutrophils; PC: plasma cells; M: macrophages, Mono: monocytes; OP: organizing pneumonia; IMT: inflammatory myofibroblastic tumor; ns: not significant.

|             | <b>vascular remodelling</b> | <b>fibrosis</b>                                 | <b>perivascular inflammation</b> | <b>peribronchial inflammation</b> | <b>interstitial inflammation</b> | <b>other comments</b>      |
|-------------|-----------------------------|-------------------------------------------------|----------------------------------|-----------------------------------|----------------------------------|----------------------------|
| <b>TG01</b> | 3<br>A (intima + media)     | 1<br>(interstitial)                             | 2/1 A/V<br>(Ly, PC, Eo)/(Ly, Eo) | 1<br>(Ly, Eo, H)                  | 1<br>(Ly, Eo, H)                 | giant cells, AlvMp, Ly, N  |
| <b>TG02</b> | 0                           | 0                                               | 1 A+V<br>(Ly, Eo, PC, M, H)      | 1<br>(Ly, Eo, H)                  | 0                                | --                         |
| <b>TG03</b> | 0                           | 0                                               | 0                                | 0-1 (Ly, Eo)                      | 0                                | --                         |
| <b>TG04</b> | 3<br>A (intima + media)     | 1<br>(tumor-like)                               | 2A+V<br>(Ly, Eo, M, PC, H)       | 2<br>(Eo, Ly, PC)                 | 0                                | OP, fibrosis like IMT      |
| <b>TG05</b> | 1<br>media                  | 3<br>(subpleural)                               | 2 A+V<br>(Ly, Eo, PC)            | 1<br>(Ly, Eo, PC)                 | 1<br>(Ly, Eo)                    | OP, in alveoli giant cells |
| <b>TG06</b> | 0                           | 0                                               | 0                                | 0                                 | 0                                | 0                          |
| <b>TG07</b> | 0                           | 3<br>(subpleural, tumor-like)                   | 2 A+V<br>(Ly, Eo, PC, H)         | 1<br>(Ly, Eo, PC)                 | 0                                | 0                          |
| <b>TG08</b> | 0                           | 3<br>(subpleural, just focal tumor-like nodule) | 1 A+V<br>(Ly, Eo, PC)            | 0                                 | 0                                | 0                          |

|                |                            |                                                                 |                             |                        |                      |                                            |
|----------------|----------------------------|-----------------------------------------------------------------|-----------------------------|------------------------|----------------------|--------------------------------------------|
| <b>TG09</b>    | 0                          | 0                                                               | 0                           | 0                      | 0                    | 0                                          |
| <b>TG+A01</b>  | 0                          | 3<br>(subpleural, tumor-like)                                   | 2 A+V<br>(Ly, PC, Eo)       | 3<br>destroyed bronchi | 2<br>(Ly, PC, Eo, N) | giant cells, fat, Alv:<br>Eos+++ , M, N    |
| <b>TG+A02</b>  | 0                          | 1<br>(perivascular, septum)                                     | 1 A<br>(Ly, PC)             | 1<br>(Ly, PC)          | 0                    | giant cells, OP, Ly in Alv                 |
| <b>TG+A03</b>  | 1<br>media                 | 3<br>(tumor-like, subpleural,<br>interstitial,<br>perivascular) | 2 A+V<br>(Ly, PC, Eo)       | 3<br>destroyed bronchi | 3<br>(Eo, Ly, PC, N) | giant cells, fat, Alv:<br>Eos+++ , M, N    |
| <b>TG+A04</b>  | 0                          | 0                                                               | 2 A+V<br>(Ly, Eo, H)        | 2<br>(Ly, H, Eo)       | 1<br>(Ly)            | 0                                          |
| <b>TG+A05</b>  | 0                          | 1<br>(tumor-like)                                               | 1 A+V<br>(Ly, Eo, PC; Mono) | 1<br>(Ly, Eo, PC)      | 0                    | 0                                          |
| <b>TG+A06</b>  | 3<br>A (intima +<br>media) | 1<br>(tumor-like)                                               | 1 A+V<br>(Ly, PC, Eo)       | 2<br>(Ly, Eo)          | 3<br>(Eo, Ly, PC, N) | Alv: M, N; OP, giant cells                 |
| <b>TG+A07</b>  | 2                          | 0                                                               | 1 A+V<br>(Ly, Eo, PC)       | 1<br>(Ly, PC, Eo)      | 0                    | 0                                          |
| <b>TG+A08</b>  | 3<br>A (intima +<br>media) | 1<br>(perivascular)                                             | 2 A+V<br>(Ly, PC, Eo)       | 1<br>(Ly, PC, Eo)      | 2<br>(Eo, Ly, N, PC) | OP, neutrophilic<br>pneumonia, giant cells |
| <b>TG+A09</b>  | 3                          | 1<br>(perivascular, tumor-like)                                 | 2 A+V<br>(Ly, Eo, PC)       | 2<br>(Ly, Eo, PC)      | 1<br>(Eo, Ly, PC)    | 0                                          |
| <b>p-value</b> | ns                         | ns                                                              | ns                          | **<br>p=0,0090         | *<br>p=0,0209        |                                            |
